# Supplementary material for: Network meta-analysis of tuina or acupuncture in combination with adjunctive therapy for cervical spondylotic radiculopathy
Source: Front Neurol. 2025 Aug 8;16:1612024. doi: 10.3389/fneur.2025.1612024 (PMC12370718; doi:10.3389/fneur.2025.1612024)
Supplement: Supplementary file 3 [file Table_3.xlsx]

## Sheet: A and B
A	Appendix 2: The characteristics and details of each study included in the NMA
No	Title	First author	Year of publication	Study type (single center/multicenter/database)	Sample size (male)		Age (mean/standard deviation)			Course of disease			Type of intervention			Intervention design			Treatment period	Follow-up time	Outcome Measures
					Group 1	Group 2	Group 1	Group 2	Group 3	Group 1	Group 2	Group 3	Group 1	Group 2	Group 3	Group 1	Group 2	Group 3
1	Effect of acupuncture on surface electromyographic signals of cervical muscles in patients with cervical spondylotic radiculopathy	Bo Li	2013	Single Center	13 (7)	14 (8)	42.5±12.2	39.9±12.4		10.6±9.1	8.9±7.1		Traction + intermediate frequency electrotherapy	Electroacupuncture		The patient's neck was flexed 30° for 20 minutes, and then medium-frequency electrotherapy was performed.	Jiaji, Fengchi, Jianjing, Ashi acupoints are selected. After getting qi, the dilatational wave is connected and the needles are retained for 20 minutes, 1/d.		2 weeks	None	Visual analogue scale for pain (points)
2	Clinical observation on the therapeutic effect of massage on cervical spondylotic radiculopathy	Zhongxiang Mi	2013	NK	30 (13)	30 (14)	mean age: 45.6	mean age: 47.5		0.2-8y	0.3-7y		Traction	Massage		Traction treatment with a four-end traction belt	Traditional massage techniques from Gansu Provincial Hospital of Traditional Chinese Medicine		4 weeks	None	Changes in pain scores (points), overall clinical efficacy (cases)
3	Observation on the therapeutic effect of acupuncture and moxibustion on cervical spondylotic radiculopathy	Yuliang Wang	2013	Single Center	94 (51)	82 (46)	31-57 (43.6 ± 7.08 mean)	28-55 (41.48 ± 6.53 mean)		0.5-9 years (mean 5.49 ± 2.83 years)	0.6-8 years (mean 4.27 ± 2.06 years)		Traction + massage	Traction + massage + acupuncture + moxibustion		Sitting traction, once every other day. Massage for 20-30 minutes, once every other day	Traction is performed when the patient is placed in a sitting position, once every other day. Massage is performed for 20-30 minutes, once every other day. Acupoints are selected for straight or oblique puncture, and the even reinforcing-reducing method is used. Moxibustion is conducted for 20-30 minutes, twice a week		2m	None	Clinical efficacy (cases), changes in clinical scores (points), VAS scores (points)
4	Clinical observation on acupuncture combined with Bianstone therapy for the treatment of cervical spondylotic radiculopathy	Henghui Xie	2013	Multi-center	35 (18)	35 (16)	36-64 (48.74 ± 6.75 mean)	35-63 (48.51 ± 6.54 mean)		7d-55m (mean 17.04 ± 12.65m)	15d-48m (16.87 ± 11.78m mean)		Acupuncture	Acupuncture + massage		Acupuncture acupoint selection, needles and acupuncture methods were the same as those in the treatment group.	Acupuncture + Bian stone therapy for regulating the Du meridian and promoting Yang (massage technique)		23d	None	Clinical efficacy (cases), symptom and sign scores before and after treatment (points)
5	Clinical observation on acupuncture combined with radiofrequency ablation in the treatment of cervical spondylotic radiculopathy	Xiaoyu Bu	2014	Single Center	44 (24)	45 (26)	28-69 (mean 47.8±5.9)	30-70 (mean 48.4±6.8)		7m-5.5y (mean 2.9±0.4y)	6m-5y (mean 2.8±0.3y)		Acupuncture + mannitol + dexamethasone + traction	Acupuncture + radiofrequency ablation		acipoints are selected to perform acupuncture, and 25% mannitol 250 mL and dexamethasone 5 mg are administered, intravenous drip, twice a day, plus traction	Acupuncture + radiofrequency ablation technique		20 days; 8 weeks	None	Pain, numbness and functional impairment (points), symptom and sign scores and intervertebral disc height R value (points), clinical efficacy comparison (cases)
6	Evaluation of the quality of life of patients with cervical spondylotic radiculopathy treated with "eight-needle neck"	Ying Wang	2014	Single Center	30 (12)	30 (14)	28-58	26-56		0.5-12y	0.5-10y		Traction	Acupuncture		Patients are placed in a sitting position to relax muscle flexion angle, with the course of treatment the same as the treatment group	Eight nape-point acupuncture manipulation		4 weeks	None	Changes in quality of life before and after treatment (points)
7	Evaluation of the effect of "eight-needle acupuncture in the neck" on pain of cervical spondylotic radiculopathy using simplified McGill scale	Ying Wang	2014	Single Center	30 (12)	30 (14)	44.37±9.16	41.01±9.26		5.08 ±3.27y	4.58 ±2.75y		Traction	Acupuncture		Patients are placed in a sitting position to relax muscle flexion angle, with the course of treatment the same as the treatment group	Eight nape-point acupuncture manipulation		2 weeks	None	Simplified McGill Pain Scale score (points)
8	Observation on the therapeutic effect of auricular acupoint pressing combined with electroacupuncture in the treatment of cervical spondylotic radiculopathy	Kai Wu	2014	Multi-center	50	50	53.11±7.96	54.79±8.32		2.69±0.42y	2.38±0.77y		Electroacupuncture	Electroacupuncture + auricular point pressing		Select acupoints, twist and insert needles, use the even reinforcing-reducing method	Acupoints are selected; the needle is inserted by twisting; even reinforcing-reducing method is used; medical adhesive tapes are used to fix the fenugreek seeds on the acupoints and press.		12d	None	Pain scores before and after treatment (points), clinical efficacy (points)
9	Massage combined with health exercises to treat cervical spondylosis of cervical type and radiculopathy	Fanping Zhao	2014	Multi-center	65 (31)	66 (32)	49.16±3.17	48.85±6.05		3.5±2.1y	3.6±8.3y		Massage	Special massage + cervical spine health exercises		Three body parts, four acupoints and five methods of massage	Three-part, four-acupoint and five-method massage, and then health exercises		35d	None	Neck disability index (points), symptom and sign score 5-item scores (points), visual analog scale score (points), comprehensive efficacy evaluation before and after treatment (cases)
10	Observation on the therapeutic effect of comprehensive rehabilitation therapy on cervical spondylotic radiculopathy	Ziyun Feng	2015	Single Center	25 (12)	25 (13)	50.33±16.98	50.36±17.23		5.07±2.62y	5.03±2.59y		Acupuncture + massage	Comprehensive therapy including acupuncture and massage		Sit and select acupoints, lift, insert, twist and turn to get qi, massage and relax the acupoints	Microwave therapy + neck muscle training + acupuncture and massage + knowledge introduction to patients		4 weeks	None	Clinical efficacy (cases), visual analogue scale score (points), cervical spondylosis clinical evaluation scale score (points)
11	Effect of warm acupuncture on plasma tumor necrosis factor in patients with cervical spondylotic radiculopathy	Feng Gao	2015	Single Center	30 (12)	30 (10)	27-64 (mean 36.1)	28-65 (mean 34.3)		NK	NK		Acupuncture + acupoint application	Warm acupuncture + acupoint application		Acupuncture + acupoint application	Acupuncture at selected acupoints and then moxibustion + acupoint application		weeks	None	evaluation of clinical efficacy (points)
12	Observation on the therapeutic effect of Shi's manipulation in treating cervical spondylotic radiculopathy	Xiang Wang	2015	Single Center	60 (31)	60 (33)	50.82±7.12	51.27±8.27		24.2±22.52	25±22.46		Comprehensive therapy including acupuncture and massage	Massage		Acupuncture and massage + physical therapy	The patient is placed in a prone position, and Shi's technique is used for to massage.		4 weeks	None	Visual analogue scale (points), clinical efficacy (points)
13	Observation on the therapeutic effect of acupuncture and massage combined with rehabilitation in the treatment of cervical spondylotic radiculopathy	Wansong Xu	2015	NK	50 (32)	50 (32)	42-78 (mean 53.98±4.77)	35-78 (mean 51.33±4.62)		8d-half year	7d-half year		Traditional Chinese medicine	Acupuncture + massage		Huangqi Guizhi Wuwu Decoction	Acupuncture and moxibustion treatment + massage		1 week	None	Main symptom scores (points)
14	Clinical study on massage combined with electroacupuncture in the treatment of cervical spondylotic radiculopathy	Shaolin Zhang	2015	Single Center	38 (22)	38 (20)	21-68 (mean 43.25 ± 2.82)	23-62 (mean 42.47 ± 3.12)		mean 11.19±10.11m	mean 10.59±9.76m		Voltaren + Traction	Massage + electroacupuncture		Oral Voltaren sustained-release tablets, head traction in sitting position	Acupoint selection, massage, acupuncture plus electronic diagnostic instrument		10d	None	Treatment effects (cases), clinical symptom scores of pain assessment index (points)
15	Clinical observation on penetrating moxibustion combined with electroacupuncture in the treatment of cervical spondylotic radiculopathy of wind-cold arthralgia type	Fuquan Jing	2015	Single Center	30 (12)	30 (11)	23-67 (mean 45.77±11.09)	21-71 (mean 46.1±12.55)		15d-4y	12d-3y		Electroacupuncture	Electroacupuncture + moxibustion		Same as the observation group, without moxibustion	Acupuncture is performed at acupoints to get qi; after even reinforcing-reducing method, power is turned on, and moxibustion is performed.		2 weeks	None	Clinical symptom scores (points), clinical efficacy (cases)
16	Clinical efficacy of moxibustion combined with Canggui acupuncture in patients with cervical spondylotic radiculopathy	Yan Zeng	2016	Single Center	43 (16)	43 (18)	43-67 (mean 55.8±8.6)	42-66 (mean 56.1±9)		1.4-4.6 years (mean 3.3±1.2)	1.3-4.5 years (mean 3.2±1.1)		Acupuncture	Moxibustion + acupuncture		Select acupoints for even reinforcing-reducing method, and retain the needle when qi is reached	Acupuncture + moxibustion		24d	None	Clinical symptom score (points)
17	Clinical observation on the treatment of cervical spondylotic radiculopathy with acupuncture combined with massage and traction	Huayue Li	2016	Single Center	50 (27)	50 (29)	22-62	20-60		25d-21y	20d-20y		Acupuncture	Acupuncture + massage + traction		Acupoints are selected to perform acupuncture	The control group received conventional acupuncture, traction and massage (selected acupoints)		2m	None	Efficacy (cases), symptom scores before and after treatment (points)
18	Clinical observation on the treatment of cervical spondylotic radiculopathy by acupuncture combined with auricular acupuncture along the skin	Hairui Lin	2016	Single Center	52 (29)	52 (28)	mean 40.62±9.8	mean 40.14±9.2		mean 39.45±12.21m	mean 39.02±11.25m		Acupuncture (Electroacupuncture)	Acupuncture + ear Acupuncture + ear pressure		Acupoints are selected for direct puncture, and then electronic therapy device was connected	The acupuncture method was the same as that of the control group. Ear acupoints are selected for penetrating, and the selected acupoints are pressed with fenugreek seeds.		44d	None	Clinical efficacy (cases), visual analogue scale scores (points)
19	Comparative observation of acupuncture and massage and posterior approach needle knife in the treatment of cervical spondylotic radiculopathy	Yong Lin	2016	Single Center	36 (20)	36 (19)	22-61 (mean 42.9 ± 3.2)	21-60 (mean 43.2±3.5)		4m-12y (mean 3.5±1.4y)	3m-11y (mean 3.7±1.2y)		Needle knife	Traction + massage + acupuncture		A No. 1 needle knife is used to insert vertically along the posterior wall of the intervertebral joint capsule. The depth of the needle knife, the horizontal distance between the needle insertion point and the skin of the front edge of the neck, the diameter of the occipital artery, the distance between the occipital artery and the mastoid tip, and the distance between the occipital artery and th…	Supine, stretching, and traction: Rolling, pushing manipulation with one finger and kneading for 10 minutes, 5 sessions in total. Massage therapy: Muscle relaxation, stretching and rotation are used to treat patients, 40 minutes each time, once a day. Acupuncture is performed mainly at Tianchuang, Tianrong, Tianding and Tianyou are the main acupoints. Houxi, Lieque, Jianzhongshu and other acupoin…		NK	None	Treatment effects (cases), visual analogue score (points), symptoms before and after treatment (points), changes in cervical physiological curvature before and after treatment (mm)
20	Observation on the therapeutic effect of acupuncture plus moxibustion in the treatment of cervical spondylotic radiculopathy	Lian Liu	2016	Single Center	30 (17)	30 (19)	32±9	37±8		7.5±4.8y	8.2±2.7y		Acupuncture + acupuncture patch	Electroacupuncture		Acupuncture plus acupoint application	Acupuncture and the even reinforcing-reducing method are used to get qi, and then the electrotherapy device is connected.		2 weeks	None	visual analogue scale (points),symptom and sign quantitative score (points)
21	Clinical study on electroacupuncture combined with massage in the treatment of cervical spondylotic radiculopathy	Chang'e Wang	2016	Single Center	56 (32)	56 (30)	52.62±1.74	52.36±1.56		6.45±1.73m	6.12±1.78m		Traction	Electroacupuncture + massage		The patient was placed in a sitting position and traction was continued for 20 minutes. Three times constituted a course of treatment, three times a week, with a 2-day interval between two courses, and four courses of treatment were continued.	The cervical Jiaji, Dazhui, Houxi, Fengchi, Hegu and Waiguan acupoints are selected. After getting qi, the electroacupuncture is connected, with 30 minutes for each session. Massage is performed at the cervical Jiaji, Dazhui, Houxi, Fengchi, Hegu, Waiguan, Jianjing, Tianzong, Fengfu, Quchi, and Shousanli acupoints. Every treatment session lasts for 20 minutes.		36d	None	Changes in McGill Pain Questionnaire scores (points), Neck Disability Index (points), clinical efficacy (cases)
22	Clinical observation of a randomized controlled trial of abdominal massage combined with acupuncture in the treatment of cervical spondylotic radiculopathy	Dali Wang	2016	Single Center	43 (17)	44 (21)	40.44±7.09	44.34±7.28		7.26±4.23y	7.92±5.03y		Conventional acupuncture	Acupuncture + massage		Acupoints: cervical vertebral acupoints, Houxi acupoints, and Ashi acupoints. Acupuncture therapy was performed once a day, 15 min/~, for a total of 12 days.	Acupoints: Qihai, Guanyuan, Zhongwan, Shenque, Juque, Huatuo Jiaji acupoints, etc. Abdominal massage: Palms are used to press Qihai and Guanyuan acupoints in the direction of the spine for about 5 minutes. Zhongwan acupoint is massaged with both palms, 20 to 30 times per minute, for about 5 minutes. Abdominal massage therapy for 10 minutes per day, for a total of 12 days. Acupoints: Neck Jiaji, F…		12d	3m	Visual analogue scale for pain (points), neck disability index (points), clinical efficacy (cases), 3-month recurrence rate (cases)
23	Clinical observation on the treatment of cervical spondylosis with massage combined with lower cervical resistance exercise	Jun Wang	2016	Single Center	30 (15)	30 (13)	40.06±8.23	42.18±7.58		1.89±0.74m	1.54±0.65m		Massage	Massage + resistance training		Rolling manipulation and pushing manipulation with one finger were used on the patient's neck. Then the thumb was used to massage Fengchi, Jianjing, and Tianzong acupoints, while the Jiaji and Fengchi acupoints on the neck were pinched. Each treatment time for both groups was 20 minutes, once a day, 5 times a week, and 4 weeks as a course of treatment.	Traction is performed with the extension speed within approximately 50/s; in the later stage of treatment, the operator can appropriately increase the resistance.		4 weeks	1 month; 2 months	Visual analogue score (points), neck disability index (points),
24	Observation on the therapeutic effect of acupuncture combined with fire dragon moxibustion in the treatment of cervical spondylotic radiculopathy of kidney deficiency and governor vessel cold type	Fuquan Jing	2016	Single Center	40 (12)	50 (16)	51.4±10.9	47.6±9.1		22.5±23.1m	23.7±23.1m		Acupuncture	Acupuncture + moxibustion		The main acupoints are Dazhui, Ganshu, Tianzhu, Houxi, cervical vertebrae Jiaji points, Taixi, Shenmai, Zusanli, and Shenshu. Acupuncture treatment is performed once a day, 30 minutes each time, 5 times from Monday to Friday, 2 days of rest on weekends, 5 times as a course of treatment, and the efficacy is evaluated after 2 courses of treatment.	Starting from the patient's Dazhui, Fengmen to Zhibian acupoints, Chinese medicinal powder with a thickness of about 1 mm was spread on the Du channel and the parts of the Foot-Taiyang Bladder Meridian. Fire Dragon Moxibustion was performed, and the above treatment was performed once every 3 days, for a total of 5 times.		2 weeks	None	Clinical efficacy (cases)
25	A multicenter clinical study on electroacupuncture and massage combined with behavioral intervention in the treatment of cervical spondylosis	Deli Sun	2017	Multi-center	100 (34)	100 (30)	47±11	50±13	48±13	1m-15y	1m-20y	1m-20y	Cupping + electroacupuncture	Cupping + massage	Cupping + electroacupuncture + massage	After cupping, acupuncture is performed on the Jiaji acupoint. After getting qi, electroacupuncture was added for 15 minutes. Then acupuncture is performed on the Fengchi acupoint,After getting qi, electroacupuncture was added for 15 minutes. The treatment is performed once every other day, 3 times a week, with 10 times as a course of treatment.	After cupping, massage therapy is used: ① Loosening technique, pushing manipulation with one finger,rolling manipulation, thumb pressing and kneading method, small rotation and shaking of the cervical spine in the state of cervical extension. The grasping and pinching manipulation is performed at Fengchi, cervical spine Jiaji, and Jianjing acupoints.	Operations of Group 1 and Group 2	weeks	4 months; 6 months	Symptom and sign scores (points), clinical efficacy (cases)
26	Effects of acupuncture, massage and cervical traction on pain relief and hs-CRP, IL-8 and substance P in patients with cervical spondylotic radiculopathy	Shunfu Zeng	2017	Single Center	56 (32)	56 (35)	25-65 (mean 48.2±3.5)	25-65 (mean 47.9 ± 4.2)		0.5-15 years (mean 4.7±0.5) a	0.5-14 years (mean 4.5±0.6) a		Traction	Acupuncture + massage + traction		Traction should be performed for 20 minutes, once a day, 15 days as a course of treatment, with 7 days of rest between courses. Traction should be performed for 2 courses.	Neck Jiaji points, Dazhui, Fengchi, Fengfu, Quchi, Waiguan, Hegu, Houxiacupoints are selected. The needles are retained for 20-30 minutes, once a day or every other day, 15 sessions as a course of treatment.The grasping and pinching manipulation is performed for 5-10 minutes, plucking method for 2 minutes, patting method for 2 minutes, kneading method for 5-10 times, traction.		44d	December	Clinical efficacy (cases),VAS score (points)
27	Effects of traditional acupuncture and massage combined with McKenzie therapy on cervical function and electrophysiological indicators in patients with cervical spondylotic radiculopathy	Yintai Li	2017	Single Center	69 (41)	60 (35)	26-67 (mean 47.2±11.3)	27-69 (mean 46.3±9.8)		11d-12y (mean 14.2±8.7m)	7d-11y (mean 13.7±9.2m)		Acupuncture + Massage	Acupuncture + massage + McKenzie therapy		Acupuncture is performed on the bilateral Jiaji and neck Bailao acupoints for about 30 minutes. Massage treatment: The patients sit down and and receive muscle massage (3-5 minutes) acupoint pressing, bone correction, relaxation and other techniques for treatment. They are relaxed after the treatment.	Traction was performed for 30 minutes for each session, once a day, and 10 sessions constituted a course of treatment.		10d	None	Changes in cervical spine function (points),clinical efficacy (cases)
28	Clinical observation on the treatment of senile cervical spondylotic radiculopathy by modified joint mobilization combined with massage	Zhicong Lin	2017	Single Center	58 (28)	58 (31)	60-75 (mean 65.9±8.7)	60-75 (mean 66.7±8.9)		61d-23y (mean 3.19+1.75y)	65d-22y (mean 3.2±1.8y)		Massage	Improved joint mobilization + massage therapy		The acupoints mainly include Fengchi, Jingjiaji, Tianding, Jianjing, Tianzong, Ashi, etc. The pushing manipulation with one finger, the arm-turning method, the traction and counter-traction method, the pushing manipulation, the grasping manipulation, the kneading method and the cervical vertebrae adjustment method are selected.	The massage was the same as the control group. Modified joint mobilization was performed once a day, 10 minutes for each session, and 10 sessions constituted a course of treatment.		10d	None	Pain severity score (points), symptoms and signs score (points)
29	Clinical study on the treatment of cervical spondylotic radiculopathy with Gutong plaster combined with nerve injury therapeutic apparatus, cervical vertebra massage and traction	Shaohua Ping	2017	Single Center	27 (15)	27 (18)	24-59 (mean 51.68±11.34)	31-62 (mean 54.41±14.36)		2.5-13m (mean 6.43±2.42m)	2-12m (mean 7.57.4±3.24m)		Ibuprofen gel + massage + traction	Tongtie plaster + nerve injury treatment device + massage + traction		The neck muscles were massaged for 10 minutes with kneading and pressing techniques, which continued for 5 minutes. The cervical spine was then rotated bilaterally and the side twisting technique was applied 5 times each. Traction was performed for 20 minutes for each session, and the treatment lasted for 16 days in total.	After traction treatment, nerve injury treatment was performed. The treatment frequency was once a day, and the course of treatment was 16 days. Tiegutong plaster: The plaster is changed the next day, once a day, 7 days as a course of treatment. The next course of treatment would strart after an interval of 2 days, and the total course of treatment is 16 days.		16d	None	Simplified McGill pain score (points), 20-point symptom quantification scale score (points),clinical efficacy (cases)
30	Clinical observation on acupuncture combined with fingertip bloodletting for the treatment of cervical spondylotic radiculopathy	Qihong Tang	2017	Single Center	40 (28)	40 (19)	30-65 (mean 52.4 ± 13.41)	32-66 (mean 51.9 ± 13.4)		1m-12y	20d-10y		Acupuncture	Acupuncture + fingertip bloodletting		The acupoints selected are the cervical paravertebral points, Dazhui, Jianjing, Tianzong, Quchi, Chize, Waiguan, Hegu, Houxi and Lieque on the affected side. After getting the qi, the needles are retained for 30 minutes, when the needles are moved once every 10 minutes, once a day, and one course of treatment is 10 days.	The acupoint selection and acupuncture method of the treatment group were the same as those of the control group. After acupuncture, a numb finger was selected, and the fingertip was routinely disinfected and then pricked with a three-edged needle. Then the finger was squeezed from the proximal end to the distal end to make the fingertip bleed 3 to 5 drops. Then the needle hole was disinfected wi…		10d	None	Clinical efficacy (cases)
31	Observation on the therapeutic effect of massage combined with electroacupuncture and simple traction in the treatment of cervical spondylotic radiculopathy	Min Yao	2017	Single Center	100 (56)	100 (58)	mean 41.2±8.7	mean 40.7±8.4		mean: 3.5±0.8y	mean: 3.7±0.6y		Traction	Massage + electroacupuncture		Traction treatment was performed for 20 minutes. One course of treatment lasted for 7 days, and a total of 4 courses were given.	Electroacupuncture combined with massage treatment was given. Fengchi, Dazhui, Waiguan, Hegu, Houxi, and Jingjiaji acupoints were selected. After acupuncture at the main acupoints, electroacupuncture instrument was added, once a day. Massage: Rolling method for 5 minutes; pushing manipulation with one finger from Fengfu to Dazhui acupoints, Fengchi to Jianjing acupoints, back and forth 2 times. T…		4 weeks	None	MC Gilll Pain Index (points), treatment effects (cases)
32	Study on the therapeutic effect of acupuncture combined with massage in the treatment of cervical spondylotic radiculopathy	Yunxia Zhang	2017	NK	62 (24)	62 (22)	32-73 (mean 56.3 ± 3.2)	33-75 (mean 56.6 ± 3.4)		2-24m (mean 7.8 ± 1.5m)	3-23m (mean 7.6 ± 1.4m)		Oral Neck Pain Granules + Methylcobalamin Capsules + Meloxicam Dispersible Tablets	Acupuncture + massage		Oral neck pain granules with boiled water, 1 bag/time, 3 times/day, methylcobalamin capsules, 1 tablet/time, 3 times/day, meloxicam dispersible tablets 7.5mg, 2 times/day, continuous treatment for 2 weeks.	Fengchi, Tianzhu and Dazhui acupoints were selected. After getting the qi, infrared magic lamp was used for irradiation treatment, and the needles were retained for 30 minutes, once a day, for 2 weeks. The grasping manipulation on the neck, isometric resistance method, and cross-arm resistance method were performed once a day. All lasted for 2 weeks.		2 weeks	None	symptom scores (points)
33	Clinical Observation on the Treatment of Cervical Spondylotic Radiculopathy with Four-Needle Therapy plus Zheng's Manipulation	Yuandong Cheng	2018	Single Center	30 (10)	30 (12)	45.43±11.304	46.53±10.265	46.27±11.132	4.98±3.084y	4.79±3.011y	4.67±2.982y	Acupuncture	Massage	Acupuncture + massage	The acupoints were the same as the combination group. After getting qi, the electroacupuncture instrument was used for 30 min/(times/day). 7 days was a course of treatment, and 2 courses of treatment were continued.	The patient was placed in a bilateral lateral decubitus position and received Zheng's traumatology techniques of stroking, kneading, pinching, and lifting and tapping for 15 min/(time/d). One course of treatment was 7 d, and two courses of treatment were required.	Select the position according to the patient's pain site (right side lying for left-sided pain; left side lying for right-sided pain), place a thin pillow on the head, and ask the patient to hold his breath and take a deep breath for a few seconds to expose the groove between the anterior and middle scalene muscles. Select four needle insertion points: three points on the posterior edge of the st…	14d	None	Visual analog pain score (points), cervical spine function score (points), clinical treatment effects (cases)
34	Clinical study on deep needling of Dazhui acupoint combined with chiropractic massage in the treatment of cervical spondylotic radiculopathy	Zheng Ding	2018	Single Center	81 (44)	81 (42)	48.64±1.94	48.80±1.97		26.88±1.94m	26.38±1.84m		Acupuncture	Acupuncture + massage		C1-C7 cervical spine, Fengchi, Jianjing, Bailao, Houxi, Waiguan, Shugu and other acupoints are selected. The pressing, kneading, and plucking techniques are used, and the needle is retained for 15 minutes. The treatment is performed once every other day, with 2 weeks as a course of treatment, and 2 courses of treatment.	C1-C7 cervical vertebral, Fengchi, Jianjing, Dazhui, Bailao, Houxi, Waiguan, and Shugu acupoints are selected. The pressing, kneading, and plucking techniques are performed. The needles are retained for 15 minutes, and the treatment is performed once every other day, 2 weeks as a course of treatment, 2 courses of treatment. Then chiropractic massage is performed. Each treatment session lasts for …		4 weeks	6m	visual analogue score (points),clinical efficacy (cases)
35	Clinical study on pain point aspiration in the treatment of cervical spondylotic radiculopathy	Yonghong Li	2018	Single Center	30 (16)	30 (17)	24-59 (mean 44.9 ± 12.43)	21-62 (mean 44.93±12.68)		10d-3y (1.21±0.97y)	10d-3y (1.21±0.99y)		Acupuncture	Pain point suction method		Acupoints are selected for acupuncture. The even reinforcing-reducing method is used, and the needle is retained for 30 minutes.	Acupoints are selected,and a 2ml syringe is used to puncture. When the patients feel soreness and swelling, the syringe is withdrawn.		6 weeks	None	Clinical efficacy (cases), pain intensity score (points)
36	Comparison of the efficacy of trigger point acupuncture and conventional electroacupuncture in the treatment of cervical spondylotic radiculopathy	Hua Tan	2018	NK	40 (24)	40 (22)	mean 42.5±8.3	mean 41.3±9.6		mean 40.6±14.7m	mean 39.8±15.1m		Electroacupuncture	Needle knife		The cervical spine, Fengchi, Tianzhu, Jianjing, Houxi, Hegu and Waiguan acupoints on both sides are selected. After getting the qi, the electroacupuncture device is connected, and the needles is retained for 25 minutes. 3 times/week, 2 weeks as a course of treatment, a total of 2 courses of treatment.	The trigger points are determined, and needle-knife is performed, preferably once a week, 2 times as a course of treatment, 2 courses in total.		4 weeks	None	Clinical efficacy (cases),visual analogue scale (points)
37	Observation on the therapeutic effect of acupuncture combined with cupping in the treatment of C5-6 single segment cervical spondylotic radiculopathy	Yiming Tao	2018	Multi-center	28 (14)	28 (11)	mean 41±1	mean 43±2		mean: 2.9±0.4y	mean: 2.8±0.3y		Acupuncture	Cupping + acupuncture		The C4-T1 segment Jiaji points (bilaterally), Fengchi (bilaterally), Tianzhu (bilaterally), and Dazhui acupoints are selected. The needle is retained for 30 minutes. The treatment is performed once every other day, with 5 sessions as a course, and a total of 2 courses are required. Follow-up is performed 3 months after the end of treatment.	On the basis of the control group, sensitive points with pain in the spinous process, transverse process or scapular area of C5-6 cervical spine were selected for acupuncture. After the treatment, local cupping was given immediately and the cup was retained for 5 minutes. This treatment was repeated every 10 days. Follow-up was performed 3 months after the treatment.		18d	3 months	visual analogue scale (points),clinical efficacy (cases)
38	Analysis of the short-term and long-term efficacy of fire needle combined with bone setting massage in the treatment of cervical spondylotic radiculopathy	Huawei Tian	2018	Single Center	49 (26)	49 (27)	18-71 (mean 48.83 ± 12.35)	19-72 (mean 47.56 ± 11.53)		4-24m (mean 12.64 ± 6.43m)	5-26m (mean 13.78 ± 7.53m)		Acetaminophen Tablets	Fire needle + massage		The patient was treated with Western medicine alone, taking 0.3 g of acetaminophen tablets orally, twice a day, after breakfast and dinner. One course of treatment lasted for 7 days, and the total treatment period was 2 months.	Milli-fire needle combined with massage was used. Massage: Quepen and Tianzong acupoints were pressed; the Jiquan acupoint was pressed, and the Shousanli acupoint was pressed. Spinal positioning rotation reduction was performed. Milli-fire needle treatment: Fengchi, Jianjing, Jingjiaji, Ashi, Dazhui, Quchi, Waiguan, and Hegu were selected. Milli-fire needle and massage were performed once every 2…		2m	6 months	clinical efficacy (cases), visual analogue scale (points)
39	Observation on the therapeutic effect of acupuncture at "three root points" combined with fine-tuning manipulation in the treatment of cervical spondylotic radiculopathy	Tianbao Wang	2018	Single Center	30 (19)	30 (21)	34-66	37-64		2d-3m	3d-2m		Acupuncture	Acupuncture + fine-tuning techniques		Acupoints: Fengchi, Jingjiaji, Jianzhongshu, Jianwaishu, Jianjing, Quchi, Shousanli, Waiguan, Houxi. With TDP lamp used for the irradiation of the neck, the needles were retained for 20 minutes.	Acupoints: Root 1, Root 2, Root 3. Acupuncture was performed to get Qi and the needles were retained for 20 minutes. Fine-tuning technique: First, the point kneading method, thenar kneading method, and the grasping manipulation are used to relax the neck, shoulders, and arms in turn for about 5 minutes. Then, the fine-tuning method was used around with the C5 spinous process. Then smoothing and m…		24d	None	Clinical efficacy (cases), mean symptom scores (VAS,points)
40	Observation on the therapeutic effect of relaxation finger kneading method plus plucking the "Jiquan" acupoint combined with electroacupuncture in the treatment of cervical spondylotic radiculopathy	Wenyuan Wang	2018	Single Center	42 (25)	41 (18)	27-70 (mean 45.38±9.47)	28-68 (mean 44.8±9.41)		5.57±3.07m	5.45±3.6m		Electroacupuncture	Electroacupuncture + massage		Acupoints: bilateral cervical vertebrae, Fengchi, Quchi, Hegu, Waiguan, Houxi. After getting the qi, electroacupuncture is connected for 30 minutes. Once every other day, 10 times as a course of treatment, continuous treatment for 1 course.	The relaxation finger-kneading method was used, from top to bottom, 3 to 4 times, and the shaking method was used to relax the arm muscles.		19d	None	Visual analogue scale (points)
41	Observation on the therapeutic effect of warm needling in treating cervical spondylotic radiculopathy	Yi Zhu	2018	Single Center	34 (14)	35 (17)	43±12	42±13	44±13	54.50(13.50,100.50)m	58.00(33.00,103.00)m	62.00(28.00,94.00)m	Acupuncture	Acupuncture + warm needling	Acupuncture + warm needling tonic and purgative	Acupoints were routinely disinfected, and stainless steel needles were used to insert 1 to 1.5 inches vertically.	After acupuncture, a moxa cone (0.16 g per cone) was placed at the end of the needle and it was lighted for warm needle treatment. 2 cones are used each time, and the needle was retained for 20 minutes without moving the needle.	Patients were diagnosed with different syndromes. Twisting and tonifying method was used for deficiency syndrome (liver and kidney deficiency type), and twisting and draining method was used for excess syndrome (wind-cold-dampness type, blood stasis and obstruction type). Needling was performed for 1 minute. Then moxa cones (0.16 g per cone) were placed at the end of the needles and ignited for w…	weeks	1 month	Clinical efficacy (cases),visual analogue scale (points)
42	A randomized controlled study on the treatment of wind-cold-damp type of cervical spondylotic radiculopathy by Tongyang-Wenjing method	Yiyi Zhang	2018	Multi-center	50 (18)	50 (14)	56.02±4.59	56.64±4.90		37.59±29.39 Unit unknown	34.86±28.19 Unit unknown		Electroacupuncture	Electroacupuncture + moxibustion		Acupoints: Dazhui, Dazhui, Jingjiaji, Houxi, Hegu. After getting the Qi, the electroacupuncture instrument is connected.	The selected acupoints and electrotherapy operation were the same as those of the control group. Moxibustionwas performed for 20 minutes, once a day, and 10 sessions constituted an observation course of treatment; after 5 consecutive days of treatment, the patients rested for 2 days and then were treated for another 5 days.		23d	3 months	symptom and sign score scores before and after treatment (points),efficacy (cases)
43	Observation on the therapeutic effect of acupuncture combined with chiropractic therapy in the treatment of cervical spondylotic radiculopathy	Xiaoying Zhang	2018	Single Center	43 (28)	43 (27)	23-67 (47.3 ± 5.2)	22-65 (47.1 ± 5.0)		2m-14y（5.VI ±1.２y）	2m-15y (5.8 ± 1.6y)		Acupuncture	Acupuncture + chiropractic		Acupoints are mainly Jiaji points, and the needles are retained for 30 minutes after receiving qi, once a day.	Acupuncture treatment was the same as the control group. Spinal rotation massage was performed		14d	6 months	Scores of various symptoms and signs (points), comparison of clinical efficacy (cases)
44	Evaluation of the effect of traditional Chinese medicine Fuyang cupping on cervical spondylotic radiculopathy	Congshan Gao	2019	Single Center	40 (15)	40 (18)	43.55±9.61	41.72±8.90		2.07±1.89y	1.94±0.59y		Massage	Fuyang cupping		The acupressure, pinching, plucking, rubbing, and massage techniques are performed on the neck to relax the muscles. Then the neck rotation method is performed, and then the rotation method on the other side is performed. Then massage is performed at the Shuangfengchi, Jianjing, and Tianzong acupoints, and finally the direct rubbing method is used to treat both sides of the cervical spine. The wh…	Cupping therapy with Fuyang Cup was performed once every 3 days, with 10 sessions as a course of treatment, for a total of 10 sessions.		30d	None	Cervical Spondylosis Syndrome Assessment Scale score (points)
45	Clinical observation on comprehensive treatment of cervical spondylotic radiculopathy with numbness as the main symptom	Junyong Lv	2019	Single Center	54 (29)	63 (23)	mean 50.2 ± 7.36	mean 48.13 ± 11.08		mean 18.56 ± 23.15 days	mean 17.13 ± 32.96 days		Traction + massage	Traction + acupuncture + massage + lightning massage		Traction therapy was performed, with a continuous traction time of 99 s, an interval time of 5 s, and each traction time of 20 min. Ten sessions constituted a course of treatment. Massage is performed when the patient is placed in a sitting position: Rolling treatment was performed on the entire neck, shoulders, and upper limb on the affected side for 2 to 3 min; then acupoints were tapped at Hou…	Treatment operation of treatment group + moxibustion-pricking bleeding + electromoximeter operation		26d	None	Cervical vertebrae function score (points),efficacy (cases)
46	Acupuncture combined with Jingtong granules in the treatment of cervical spondylotic radiculopathy and its effects on IL-6, TNF-α, IL-1β and blood rheology indexes in patients	Shenglian Pan	2019	Single Center	57 (32)	57 (31)	28-68 (mean 49±5)	26-67 (mean 50±5)		3-9 years (mean 5.9 ± 1.2 years)	3-8 years (mean 5.8 ± 1.2 years)		Oral Neck Pain Granules	Neck pain granules + acupuncture		Oral administration of Neck Pain Granules, 4 g each time, 3 times a day for a total of 4 weeks.	Oral administration of Jingtong Granules, 4 g each time, 3 times a day. Treatment for 4 weeks in total. Acupoints: Dazhui, Tianzhu, Houxi, cervical vertebrae Jiaji points, Quchi, Hegu, Waiguan. Procedure: Acupuncture, retaining the needle for 30 minutes, once a day, for 4 weeks in total.		4 weeks	None	McGill pain questionnaire score (points), neck disability index (points)
47	Effect of TCM syndrome differentiation and massage combined with acupuncture on cervical spondylotic radiculopathy	Yu Tang	2019	Single Center	43 (23)	43 (25)	20-56 (mean 40.12±8.20)	18-58 (mean 39.65±7.85)		5m-4y (mean 1.82±0.57y)	6m-5y (mean (1.90±0.46y)		Acupuncture	Massage + acupuncture		Acupoints: Dazhui, Fengchi, Shousanli, Jianjing, Quchi, Waiguan, and Hegu are the main acupoints. Supplementary acupoints: For pain in the front of the neck, the Large Intestine Meridian of Hand-Yangming and Shousanli acupoints are used; for pain in the neck, both sides, and occipital area, the Small Intestine Meridian of Hand-Yangming acupoint, Houxi acupoint, and Yanglao acupoint are used. Afte…	Acupoints: Dazhui, Fengchi, Shousanli, Jianjing, Quchi, Waiguan, and Hegu are the main acupoints. Auxiliary acupoints: For pain in the front of the neck, the hand yangming large intestine acupoint and Shousanli acupoint are used; for pain in the neck, both sides, and occipital area, the hand taiyang small intestine meridian acupoints, Houxi acupoints, and Yanglao acupoints are used. After routine…		2 weeks	None	pain score (points)
48	Therapeutic effect of triple needling and warming acupuncture at cervical vertebral acupoints in the treatment of cervical spondylotic radiculopathy and its effect on cervical vertebrae mobility	Ke Yang	2019	Single Center	40 (21)	40 (23)	28-65 (49.6 ± 5.8)	27-64 (48.6 ± 6.2)		0.5-8.6y (4.3 ± 0.90y)	0.6-9.5y (5.1±0.8y)		Acupuncture	Acupuncture + warm needling		Direct acupuncture of cervical Jiaji points was given; then bilateral Dazhui, Quchi, Fengchi and Hegu points on the affected side were used as auxiliary points for acupuncture treatment, with the same manipulation as before.	The patients were treated with triple needling and warm acupuncture at the cervical Jiaji points. The acupoints and manipulations were the same as those in the control group. Both groups were treated for 30 min/time, once/day, 5 times a week, and 2 weeks of continuous treatment as one course of treatment. Both groups received one course of treatment.		2 weeks	None	Pain score (points),treatment efficacy (cases)
49	Clinical study on the treatment of neck arthralgia by needle knife whole body release combined with warm acupuncture and moxibustion	Zhongliang Zhou	2019	Single Center	30 (19)	30 (14)	mean 48.59±7.89	mean 50.26±4.09		mean 12.05±6.08m	mean 11.44±7.81m		Warm acupuncture	Needle knife + warm acupuncture		The Ashi acupoint on the affected side of the patient, bilateral Jiaji acupoints on the patient's neck, the bilateral Fengchi acupoints on the gallbladder meridian, and the bilateral Houxi acupoints on the small intestine meridian are selected. Operation: Acupuncture, moxibustion after acupuncture, and intermittent needling once during warm needling. Warm moxibustion once a day, with 2 weeks as a…	The needle knife therapy was performed once a week, for a total of 2 treatment sessions. The warm acupuncture method was the same as that of the control group, but no warm moxibustion was performed on the day of the needle knife treatment.		2 weeks	None	Symptom and sign scores (points), clinical efficacy (cases)
50	Observation on the therapeutic effect of deep acupuncture combined with chiropractic massage in the treatment of cervical spondylotic radiculopathy	Xinnian Guo	2020	Single Center	45 (25)	45 (23)	mean 48.42±5.08	mean 48.71±5.20		mean 25.32±4.84m	mean 25.09±4.78m		Traction + etoricoxib	Traction + etoricoxib + acupuncture + massage		Traction was performed for 20 minutes each time, once a day. Etoricoxib was taken orally, 30 mg each time, once a day.	Traction + Western medicine is the same as the control group. Acupuncture: Acupoints related to the C1-C7 segments were selected, including the cervical vertebrae, Bailao, Houxi, Waiguan, Fengchi, Jianjing, and Dazhui; the needles were retained for 15 minutes, and acupuncture was performed once every other day. 2) Chiropractic massage: the large tendons behind the neck are grasped for 3 minutes, …		4 weeks	None	Short-term efficacy (cases),visual analogue scale (points)
51	Clinical study on the treatment of cervical spondylotic radiculopathy with three-dimensional bone setting and massage	Xueyu Jiang	2020	Single Center	30 (14)	30 (12)	21-56 (mean 54.8±0.7)	18-58 (mean 51.1±1.8)		1-29m (mean 9.7±0.5m)	1-36m (mean 8.2±1.1m)		Electroacupuncture	Massage		Electroacupuncture was used at the cervical Jiaji, Dazhui, Tianzhu, and Houxi acupoint. After getting the qi, another needle was inserted 0.5 cm away from each needle (no need to get the qi), which was used as the negative electrode of electroacupuncture. The electronic acupuncture instrument was connected and the needle was retained for 30 minutes. The treatment method was applied once a day, wi…	Orthodontic technique at coronal axial and transverse axial sites		20d	None	Clinical efficacy (cases), visual analogue scale (points)
52	The efficacy of deep needling combined with massage in the treatment of cervical spondylotic radiculopathy and its effect on laboratory indexes	Mingli Li	2020	Single Center	70 (40)	70 (43)	48.42±5.08	48.71±5.20		25.32±4.84m	25.09±4.78m		Traction + Etoricoxib + Massage	Traction + etoricoxib + massage + acupuncture		Traction + taking etoricoxib + massage. Massage: First, roll the infraspinatus and trapezius muscles for 5 minutes, then hold and rub the big tendons behind the neck for 3 minutes, press Tianzong, Ashi and Jianjing acupoints for 2 minutes; use the thumb to pluck the cord nodules in the neck (4-5 times), and continue to press and rub Tianzhu, Fengfu, Ashi, Fengchi and Shousanli acupoints for 1 min…	All operations in the control group; Dazhui, Jingjiaji, Waiguan, Fengchi, Bailao, Houxi, Jianjing and Shugu acupoints were selected; the needles were retained for 15 min after getting qi; acupuncture was performed once every 2 days; the treatment course for both groups was 1 month.		1m	None	Clinical efficacy (cases),simulated pain score (points)
53	Clinical Observation on Electroacupuncture for Cervical Spondylotic Radiculopathy	Chunhua Song	2020	Single Center	31 (16)	31 (17)	22-45 (mean 31.97±1.49)	21-46 (mean 32.11±4.06)		NK	NK		Acupuncture	Electroacupuncture		Jiaji, Gaomang, and Ashi acupoints are selected for acupuncture to get qi.	The patients were treated with electroacupuncture. The acupoints were the same as those in the control group. The patients were placed in a supine position with the neck and back fully exposed. The Jiaji, Gaomang and Ashi acupoints were selected for acupuncture. The Qifeng Bupingxie method was used for treatment. If the patient felt local swelling and numbness, the G6802-H electroacupuncture ther…		10d	None	Symptom and sign score (points)
54	Clinical analysis of ultrasound-guided needle knife release combined with acupuncture in the treatment of cervical spondylotic radiculopathy	Shuchen Zhang	2020	Single Center	30 (24)	30 (19)	40-69 (mean 54.34±4.25)	42-68 (mean 60.34±2.25)	47-67 (mean 62.40 ± 3.050	5m-4y (mean 2.08±0.21y)	6m-5y (mean 2.08±0.21y)	6m-5y (mean 3.78±0.90y)	Acupuncture	Ultrasound-guided acupotomy	Acupuncture and ultrasound-guided needle knife release combined treatment. Acupuncture treatment is not performed on the day of needle knife release and the first day after surgery.	Bilateral cervical paravertebral C3-C5, Fengchi, Tianzhu, Dazhui, Jianjing, Quchi, Xiaohai, Waiguan, Zhizheng, Houxi, Hegu acupoints are selected. Operation: The patient is placed in a prone or sitting position, and the skin of the neck and upper limbs is fully exposed. The acupoints are routinely disinfected, even reinforcing-reducing method and disposable sterile acupuncture needles are used to…	Needle knife therapy was performed once a week for 3 consecutive weeks.	The patient received acupuncture and ultrasound-guided needle knife lysis combined treatment. Acupuncture was not performed on the day of needle knife lysis and the first day after surgery. The rest of the treatment was continued for 3 weeks with the above method.	weeks	NK	Clinical efficacy (points), visual analogue scale (points), clinical symptom score (points),
55	Observation on the therapeutic effect of tendon-bone balance massage in treating cervical spondylotic radiculopathy	Zhibin Guo	2021	Single Center	62 (39)	62 (37)	35-64 (mean 45.97±5.19)	38-65 (mean 43.28±4.75)		1-3 days (mean 1.65±0.42 days)	1-3 days (mean 1.82±0.51 days)		Traction + anti-inflammatory analgesia + nerve nutrition	Traction + anti-inflammatory analgesia + nerve nutrition + massage		Traction + anti-inflammatory analgesia + trophic nerve	Traction + anti-inflammatory analgesia + trophic nerve + exploration of positive reaction points. Explore positive reaction points: palpation was performed to find positive reaction points (tenderness points) to determine the location of the disease and changes in organ function. Relax muscles and tendons: kneading was performed on the muscles and ligaments on both sides of the patient's neck, an…		7d	None	Clinical efficacy (cases), digital assessment scale (points), neck disability index (points)
56	Treatment of cervical spondylotic radiculopathy with TCM chiropractic plus electroacupuncture combined with rehabilitation training	Chunfeng Jin	2021	Single Center	35 (20)	35 (19)	38-66 (mean 45.0±4.0)	38-66 (mean 45.6±3.6)		3-60m (mean 37.1±10.4m)	4-60m (mean 37.9±10.2m)		Electroacupuncture + rehabilitation training	Chiropractic + electroacupuncture + rehabilitation training		Jiaji acupoints corresponding to the patient's spinal nerves and the adjacent Jiaji acupoints are determined. Electroacupuncture needles are disinfected. The neck is grasped and pinched for rehabilitation training, 10 times a day	In addition to the operation of the control group, massage methods such as kneading and pressing are used to loosen the neck muscles. The operators place their right hand on the left side of the face of the patients, flex the head laterally and rotate it to the right, and when the torque is transmitted to the operator's left thumb, gently flick the right hand and a "click" sound can be heard.		10d	None	Changes in pain (points)
57	Observation on the therapeutic effect of muscle bone balance massage in the treatment of cervical spondylotic radiculopathy	Junhu Ma	2021	Single Center	54 (25)	54 (23)	26-72 (mean 49.93±7.32)	29-74 (mean 50.62±7.49)		6-36m (mean 10.02±2.18m)	4-38m (mean 10.48±2.27m)		Chinese medicine fumigation + oral administration of Chinese patent medicine	Chinese medicine fumigation + Chinese patent medicine oral administration + massage		The Chinese medicine fumigation prescription is Wutou Decoction. Each fumigation lasts 20 to 25 minutes, once a day, and 5 times is a course of treatment. Chinese patent medicine for oral administration: oral Jingtong granules, 1 bag/time, 3 times a day, taken with boiled water, 7 days as a course of treatment. Treatment lasts 2 courses.	The operation methods in the control group + Pingle bonesetting "muscle stagnation and bone dislocation" balance theory guided by massage bone setting treatment		14d	None	Visual analogue scale (points),clinical efficacy (cases),
58	Effects of group acupuncture combined with chiropractic manipulation on cervical blood flow velocity, cervical function, pain mediators and plasma endothelin in patients with cervical spondylotic radiculopathy	Liangqun Wu	2021	Single Center	46 (27)	46 (26)	mean 49.79±6.23	mean 50.23±5.79		None	None		Basic treatment + chiropractic	Basic treatment + chiropractic + acupuncture		The pinching manipulation is used to pinch the Fengchi and Jianjing acupoints for 1 min, respectively. One hand is placed on the patient's mandible, and the other hand is used to fix the back of the patient's head. The patient's neckis is slowly turned to the affected side. The neck is pulled slightly when resistance is felt. Traction is performed. Before treatment, grasping and kneading are used…	The operation method in the control group+ Fengchi, Wangu, Dazhui and Fengmen acupoints. The needles were retained for about 30 minutes after insertion, once every other day.		21d	None	Clinical efficacy (cases), neck disability index (points)
59	Observation on the therapeutic effect of deep needling of cervical Jiaji points with warm needles on cervical spondylotic radiculopathy	Xiaoyuan Yu	2021	Single Center	64 (16)	64 (20)	43.41±16.55	48.56±14.73		62.43±92.74m	70.33±66.84m		Electrotherapy	Acupuncture + electromagnetic therapy device		Ultrashort wave electrotherapy machine and computer medium frequency therapy device are used to place electrodes on the lesion site of cervical spine, the transition site of trapezius muscle to shoulder, the upper angle of scapula and the medial edge of scapula for treatment.	Deep acupuncture was performed mainly at the neck Jiaji acupoint at the site of cervical lesions, combined with conventional acupuncture at Tianzhu, Dazhui, Jianjing, Quchi, Waiguan, and Hejie acupoints, as well as a specific electromagnetic wave therapy device (TDP).		2 weeks	6 months	Clinical efficacy (cases), visual analogue scale (points), symptom and sign scale score (points)
60	Clinical study on the treatment of cervical spondylotic radiculopathy with three-dimensional balanced spinal correction combined with acupuncture	Qinghao Zhang	2021	Single Center	29 (15)	28 (11)	46.34±6.61	48.89±6.08	48.36±7.13	4.07±1.56y	4.46±1.82y	3.64±1.64y	Massage + Acupuncture	acupuncture	Chiropractic + acupuncture	(1) Acupuncture treatment: acupoints and manipulation techniques were the same as those of the observation group, and the needles were retained for 20 to 30 minutes. (2) Conventional massage techniques: relaxation and tendon massage techniques were the same as those of the observation group.	Acupuncture alone was used for treatment, with the acupoints and manipulations the same as the above two groups, and the needles were retained for 20 to 30 minutes.	(I) Acupuncture treatment: Take the cervical Jiaji, Tianzhu, Houxi, Shenmai, Xuanzhong, Shousanli, Shaohai points, and after the needling is done, the thumb is pointed backward and the index finger is pointed forward to perform the twisting method, with a twisting angle of 360 degrees. The twisting frequency is 120 to 160 times per minute, and the stimulation time is 1 minute, so that the local a…	30d	None	Visual analogue scale (points), neck disability index (points),clinical efficacy (cases)
61	Clinical Observation on the Treatment of Wind-cold-dampness Type Cervical Spondylotic Radiculopathy by Electroacupuncture at Jiaji Points Combined with Thunder-fire Moxibustion	Yimo Zhang	2021	Single Center	49 (24)	49 (20)	38.82±6.75	39.63±6.55		３．７２±０．７５y	４．６３±１．０５y		Analgesia, antispasmodics, nerve nutrition therapy + electroacupuncture	Pain relief, antispasmodic, nerve nutrition treatment + electroacupuncture + thunder and fire moxibustion		All patients were given conventional treatments such as analgesia, antispasmodics, and nerve nutrition drugs. Both groups of patients received electroacupuncture treatment once every other day for 2 consecutive weeks. Bilateral cervical vertebrae (C1-C6) acupoints were selected, and after getting qi, the electroacupuncture instrument was connected and the needles were removed after 30 minutes.	On the basis of the treatment of the control group, the observation group was additionally treated with thunder-fire moxibustion at bilateral neck Jiaji acupoints (C1-C6), once every other day for 2 consecutive weeks.		2 weeks	None	MPQ pain questionnaire score (points), cervical spine dysfunction score (points)
62	Clinical study on 40 cases of cervical spondylotic radiculopathy treated with traditional Chinese medicine bone setting manipulation combined with conventional therapy	Jin Xiaoyu	2021	Single Center	40 (16)	40 (15)	44.03±10.33	39.6±9.76		7.66±6.5m	5.82±4.28m		Physiotherapy	Physical therapy + massage		Routine treatments such as physical red light irradiation and neck and shoulder muscle massage were given. Physical red light irradiation was performed on the neck and shoulders for 15 minutes; followed by neck and shoulder muscle massage for 10 minutes, evenly and forcefully lifting, kneading, pushing and kneading the neck muscles until the muscle knots were loose. Then the patient was placed in…	After receiving routine treatment (same as the control group) on the day of enrollment, Professor Huang Guicheng's empirical bone-setting manipulation treatment was added.		1m	None	Visual analogue score (points),neck disability index (points)
63	Warm acupuncture combined with nerve mobilization is effective in treating cervical spondylotic radiculopathy	Lizhi Qiu	2022	Single Center	50 (27)	50 (24)	47.93±10.42	47.52±10.16		10.58±4.21m	10.29±4.48m		Nerve mobilization therapy	Nerve mobilization therapy + warm acupuncture		Median nerve: The patient lies on his back, the shoulder strap is pressed down, the shoulder joint is abducted, the elbow joint is extended, the arm is externally rotated and the forearm is supinated, the thumb, fingers and wrist joints are extended, the shoulder joint is maximally abducted, and the complete traction posture includes lateral flexion of the neck to the opposite side; ② Radial nerv…	According to the actual situation of the patient, sliding manipulation or tension manipulation was used, once a day, for 1 week. Acupoints: Dazhui, bilateral Tianzhu, bilateral Fengchi, and neck Jiaji points. Moxibustion was performed after getting qi. Warm acupuncture lasted for 30 minutes, once a day, for 1 week.		1 week	None	neck pain scale (points), cervical spondylosis clinical evaluation scale (points)
64	Effect of acupuncture combined with exercise therapy on cervical spondylotic radiculopathy and its effect on blood rheology	Jianpeng Hou	2022	Single Center	44 (20)	45 (22)	27-65 (mean 44.32±3.01)	29-66 (mean 45.26±2.59)		2m-9y (mean 3.6±2.7y)	2m-8y (mean 3.4±2.1y)		acupuncture	Acupuncture + exercise therapy		Conventional acupuncture treatment was performed at bilateral Fengchi, Tianzhu, Wangu and Fengfu acupoints. The treatment lasted about 30 minutes per day, 7 days as one course of treatment, and two courses in total.	The observation group was additionally treated with exercise therapy based on the acupoint selection and acupuncture methods in the control group. Each treatment session lasted about 30 minutes, once a day, with 7 days as a course of treatment, and a total of two courses of treatment.		14d	None	Symptom and sign score (points), clinical efficacy (cases)
65	Clinical study on the treatment of cervical spondylotic radiculopathy by massage manipulation combined with dragon-tiger acupuncture at cervical vertebral acupoints under the guidance of the idea of "giving equal importance to tendons and bones"	Junchao Lan	2022	Single Center	54 (31)	54 (32)	18-48 (mean 32.49+4.28)	19-46 (mean 32.84±5.36)		3-14m (mean 7.82±1.49m)	4-14m (mean 7.71±1.35m)		Jingshu Granules + massage	Jingshu granule + massage + acupuncture		Jingshu granules are taken with warm water, 1 bag/time, 3 times/day. The treatment lasted for over 2 weeks. Before treatment, modern imaging examination and doctor's palpation are used to discriminate symptoms of muscle and bone. If imaging shows morphological changes such as joint protrusion, instability, and narrowing of the intervertebral foramen, reduction techniques are mainly used for massa…	In addition to the operation methods in the control group, patients were placed in a sitting position with their upper limbs naturally bent and placed on their thighs. The bilateral Jiaji acupoints on the neck, Jianwaishu and Quchi acupoints on the corresponding lesion segments were selected. The needles were retained for 30 minutes. Acupuncture treatment was performed once a day for 2 weeks.		2 weeks	None	Clinical efficacy (cases), visual analogue scale (points), clinical evaluation of cervical spondylosis (points)
66	Observation on the therapeutic effect of dredging meridian points with massage combined with acupuncture in the treatment of cervical radiculopathy of qi stagnation and blood stasis type	Yajun Li	2022	Single Center	40 (25)	40 (23)	30-66 (mean 39.98 ± 6.66)	29-65 (mean 38.48±6.84)		4-11m (mean 6.01±1.09m)	5-12m (mean 5.97 ± 1.23m)		Acupuncture	Massage + acupuncture		Acupoints: Tianzhu, Fengchi, Dazhui, Jingjiaji, Waiguan, Houxi, Ashi. Acupuncture is performed to get Qi, and the treatment lasts 25 to 30 minutes, once a day.	The operation methods in the control group + massage. Massage: The pushing manipulation with one finger method was used to push and rub from Fengchi point along both sides of the neck to the junction of neck and shoulder, and repeated 20 times. Massage was used to massage the neck and shoulder on both sides for 7 minutes. The grasping manipulation was performed at the Jianjing acupoint for 1 minu…		6 weeks	None	visual analogue scale (scores)
67	Observation on the therapeutic effect of acupuncture combined with acupoint massage in the treatment of cervical spondylotic radiculopathy of qi stagnation and blood stasis type	Mingxing Ren	2022	Single Center	52 (23)	55 (25)	51.38±11.36	50.89±11.42		33.98±15.62m	34.01±15.54m		Traction	Acupuncture + massage		Traction therapy	Massage method: 1 time/d. The pushing manipulation with one finger method was used to and acupressure were used to massage the patient's Tianding, Tianchuang, Tianyou, and Tianrong acupoints for about 15 minutes. straight-side puncture: bilateral C4-7 neck Jiaji acupoints are selected, and the needles are retained for 30 minutes after getting qi, 1 time/d, with an interval of 10 minutes between m…		2 weeks	None	McGill pain questionnaire score and total score (points)
68	Effect of suspension exercise therapy combined with massage and tendon-regulating manipulation on upper limb sensory function in patients with cervical spondylotic radiculopathy	Tao Yin	2022	Single Center	36 (11)	36 (9)	44.08±8.88	45.19±10.09		22. 17±14.96m	24.94 18.07m		Traction	Massage		Cervical traction therapy was used as the treatment plan, with each treatment session lasting 30 minutes, 6 times/week, for a total of 4 weeks.	Active exercise + SET device treatment combined with massage therapy. Massage therapy: the kneading manipulation was performed at Fengchi, Jianjing, Jianwaishu, Quchi, Shousanli, and Hegu acupoints for about 10 minutes. The rolling method was used to relax the neck and shoulders for 10 minutes. The grasping manipulation was used to massage the neck and both sides of the shoulder well and rub the …		4 weeks	None	visual analogue scale of upper limb (points)
69	The efficacy of acupuncture combined with massage in the treatment of cervical spondylotic radiculopathy and its effect on patients' shoulder pain and cervical range of motion	Jun Chen	2023	Single Center	40 (21)	40 (20)	33-72 (mean 53.38±9.71)	23-93 (mean 50.88 ± 12.12)		1-24m (mean 13.73±5.39m)	4-22m (13.15±4.07m)		Traction	Traction + acupuncture + massage		Traction therapy was performed, with 7 days as one course of treatment, and 2 courses of treatment were required.	Bilateral Fengchi, bilateral Tianzhu, bilateral 4-7 Jiaji, bilateral Lieque, bilateral Houxi acupoints were selected. Acupuncture was performed to get Qi, once a day. Massage: the kneading and massaging manipulations were performed on both sides of the neck and shoulders, mainly on the hardened areas until the muscles relaxed. The lower jaw was lifted, pulled, and rotated toward the affected side…		14d	None	Clinical efficacy (points), visual analogue scale (points), clinical evaluation scale for cervical spondylosis (points)
70	Evaluation of the therapeutic effect of acupuncture combined with manipulation in the treatment of cervical spondylotic radiculopathy	Yu Chen	2023	Single Center	60 (33)	60 (32)	27-69 (mean 49.52±5.87)	26-68 (mean 50.32±5.48)		3-8 years (mean 5.91±1.17 years)	3-9 years (mean 5.86±1.21 years)		Massage	Massage + acupuncture		The kneading, rolling and pushing manipulation with one finger techniques are performed on the patients' upper back, shoulder and neck for 10 minutes. The neck was gently lifted and stretched along the C3 and C4 cervical vertebrae for more than 1 minute, with the spinous processes as the fulcrum. The index, middle and ring fingers were used as the fulcrum to push horizontally along the bladder me…	The observation group received acupuncture treatment on the basis of traction therapy and TCM manipulation therapy. Bilateral Quchi, bilateral Waiguan, bilateral neck Jiaji points, bilateral Tianzhu, Hegu on the healthy side, Dazhui, Houxi on the healthy side acupoints were selected. The treatment was performed 1 time/day, with needle retained for about 0.5 h/time, and a total of 1 month.		1m	None	Simplified McGill pain questionnaire (points), neck disability index (points), efficacy evaluation (cases)
71	Observation on the efficacy of needle stimulation of painful points combined with ultrasound-guided nerve root block in the treatment of cervical spondylotic radiculopathy	Qing Sun	2023	Single Center	30 (12)	30 (17)	55±9	54±10		24 (12, 42) M	24 (12, 63) M		Simple nerve block	Needle stimulation of pain points + nerve block		Celecoxib capsules 200 mg were used for anti-inflammatory and analgesic treatment, 1 tablet once a day; if pain continued, tramadol was used for rescue analgesia, 1/2 tablet to 1 tablet orally each time, 1 to 3 times a day, depending on the patient's pain level. Celecoxib was used for analgesia after discharge. Both groups of patients received ultrasound-guided cervical nerve root block, and the …	The operation methods in the control group + the following operations: the index and middle fingers of the lesft hand are used to fix the marked skin, and the right hand inserts the needle into the myofascial trigger point. The needle is inserted quickly with a fast in-and-out technique until the local twitch reaction disappears. Treatment is performed once a week, for a total of 4 times.		4 weeks	3 months	Visual analogue scale (points), neck disability index (points)
72	Clinical efficacy of abdominal acupuncture combined with knot-untying acupuncture in the treatment of cervical spondylotic radiculopathy and its effect on neck and shoulder pain	Chunhua Zheng	2023	Single Center	50 (21)	50 (24)	50.10±6.34	49.31±6.22		11.44±6.67m	10.95±6.28m		Acupuncture + massage	acupuncture		Acupuncture treatment: Bailao, Dazhui, Jianjing, and Tianzong acupoints of the patient's neck are selected to perform acupuncture once a day, one week as a course of treatment, with a total of 12 courses of treatment. Massage treatment: (1) The patient is placed in a sitting position, and the doctor uses massage, pushing manipulation with one finger and other methods to relax the patient's neck a…	Abdominal acupuncture treatment: The patient lies on his back and acupuncture is performed on the acupoints of Zhongwan, Guanyuan, Shangqu, Huaroumen, and Shiguan, once a day, 10 sessions as a course of treatment, and 9 courses of treatment are required. Jiejie acupuncture treatment: The patient is placed in a sitting position, and 1 to 3 stiff and contracted muscle knots in the neck and shoulder…		90d	6 months	Clinical efficacy (cases), neck disability index (points), visual analogue scale (points)
73	Clinical study on acupuncture combined with meridian flow point massage in the treatment of cervical spondylotic radiculopathy	Lu Yi	2023	Single Center	42 (20)	42 (21)	27-65 (43.8±5.29)	29-63 (42.74±4.56)		6m-8 (3.26 ± 0.98)y	8m-7 (3.35 ± 1.2) y		Oral methylcobalamin tablets + oral vitamin B1 + oral oryzanol tablets + physical therapy	Oral methylcobalamin tablets + oral vitamin B1 + physical therapy + acupuncture + massage		Oral administration of oryzanol tablets, 30 mg each time, 3 times a day; methylcobalamin tablets, 0.5 mg each time, 3 times a day; vitamin B1 tablets, 20 mg each time, 3 times a day. Cervical traction and immobilization: Continuous traction for 1 hour each time, once a day. Physical therapy: The infrared therapy device is used to irradiate the painful part of the neck, 20 minutes each time, twice…	On the basis of the interventions of control group, acupuncture was performed at Tianzong, Jianzhen, Quchi, Bibi, Zhongzhu, Waiguan on the affected side and neck Jiaji acupoints on the neuropathy lesions. The needles were retained for 30 minutes after the qi was obtained, once a day. Massage on Ziwu Liuzhu acupoint: According to the patient's consultation time, the main acupoints were determined …		1m	None	Neck disability index (points), clinical efficacy (cases)
B
No	title	First author	Year of publication	Study type (single/multicenter/database)	Sample size (male)		Age (mean/standard deviation)			Course of disease			Type of intervention				Intervention design			Healing period	Follow-up time	Outcome Measures
					Group 1	Group 2	Group 1	Group 2	Group 3	Group 1	Group 2	Group 3	Group 1	Group 2	Group 3		Group 1	Group 2	Group 3
1	Comparison of efficacy between electroacupuncture and the combination of collateral bloodletting, cupping, and acupoint application for cervical spondylosis radiculopathy (CRS)	Hu, A. E.	2014	Single Center	61 (30)	61 (31)	18-44 mean 31.5			days-4 years (mean 73.5 days)			Electroacupuncture	Cupping and acupoint application			Zanzhu, Fengchi, Zanzhu, Waiguan, and Hegu acupoints were selected. After getting the Qi, the electroacupuncture instrument was connected. The patient was treated once a day. 10 treatment sessions are a course of treatment.	Bypass bloodletting and cupping: "Moving cupping" is performed 10 to 15 times on the muscles of the patient's spine and shoulder blades from top to bottom; the Dazhui and Ashi acupoint and the site of ecchymosis are quickly punctured with a three-edged needle, and the cupping lasts for 10 minutes. The patient receives treatment once every 5 days, and two courses of treatment constitute a course o…		10d	None	symptoms and signs (points)
2	Treatment of 30 patients with cervical spondylotic radiculopathy by acupuncture plus warming-needle moxibustion: a randomized controlled trial	Zhou, J. F.	2014	Single Center	30 (18)	30 (22)	22-65 (mean 43.3)	19-60 (mean 39.2)		NK	NK		Acupuncture	Warm acupuncture			Acuppoints were selected to perform acupuncture to obtain qi, and the needles were retained for 30 minutes, once a day, 30 minutes for each session, 10 sessions as a course of treatment	After acupuncture, moxibustion is performed, and each acupoint is burned with 2 moxa cones.		10d	None	20-point symptom scale (points), visual analogue scale (points), clinical efficacy (cases)
3	Randomized controlled study of cervical rehabilitation training combined with acupuncture for cervical spondylosis radiculopathy	Bao, Y.	2015	Single Center	30 (17)	30 (14)	23-58 (mean 39.27 ± 6.94)	25-60 (mean 38.62 ± 6.57)		6-27 days (mean 10.2 ± 3.6 days)	7-25 days (mean 9.7 ± 3.4 days)		Acupuncture	Acupuncture + Neck Rehabilitation Training			Dazhui, C3~ C7Corresponding Jiaji points, Houxi, Tianzhu, Fengmen, and Waiguan acupoints were selected. After getting the qi, the needles were retained for 40 min. The treatment was performed once a day. The patient rested for 1 day after 6 consecutive days of treatment. A total of 21 days of treatment were required.	Acupuncture acupoints and manipulations were the same as those in the control group. Neck rehabilitation training: First, the kneading, pinching, pulling, pressing, and patting manupulations were used to loosen the shoulder muscles, and then the cervical splenius to the bilateral trapezius and sternocleidomastoid muscles was kneaded. The thenar rolling method was performed on both sides of the ne…		21d	None	Visual analogue scale (points)
4	Clinical study of cervical spondylotic radiculopathy treated with massage therapy combined with Magnetic sticking therapy at the auricular points and the cost comparison	Wang, S.	2015	Single Center	34 (10)	35 (11)	30-65 (mean 39±8)	30-64 (mean 39±9)		1-60m (mean 21.9±2.6m)	1-61 (mean 19.8±2.5m)		Massage	Massage + auricular magnetic therapy			The kneading, rolling, grasping, rubbing and other techniques were used. Main acupoints: Fengchi, Jianjing, Jianwaishu, Jianshi, Quchi, Shousanli, Hegu. Operation: The kneading manipulation was used to treat Fengchi, Jianjing, Jianwaishu, Jianshi, Quchi, Shousanli, Hegu and other acupoints for 5 minutes; the rolling manipulation was used to relax the neck and shoulders for 10 minutes; the graspin…	Massage operation in the control group + operation below the neck. Acupoints: auricular point sticking was performed on vertebra,liver, kidney, ear, Shenmen acupoint, and cortex and the plaster was changed once a day. The patient was advised to receive this treatment 2 to 3 times a day, with 3 to 5 minutes each time.		4 weeks	None	superficial cervical muscle pain score (points), clinical efficacy (cases)
5	The clinical observation on acupuncture thermal moxibustion combined with convention acupuncture in treatment of acute cervical spondylotic radiculopathy	Ye, Y. X.	2015	Single Center	81 (46)	88 (50)	mean 46.20±8.90	mean 45.90±10.20		mean: 2.1±0.8y	mean 2.2±0.4y		Acupuncture	Acupuncture + thermosensitive moxibustion			Acupuncture was performed bilaterally at Bailao, Jianzhongshu and Zhongzhu acupoints. The needles were retained for 30 min and acupuncture was performed every 10 min.	thermosensitive moxibustion + conventional acupuncture in the acupuncture group. The cord-like areas were identified near the cervical vertebral acupoints, Jianjing, Fengchi, Shousanli, Dazhui, Yanglingquan and Feishu. The treatment was performed once a day, 6 days as a course of treatment, with a total of 2 courses.		12d	None	Visual analogue score (points), symptom and sign score (points), clinical efficacy (cases)
6	Observations on the efficacy of combined acupuncture and medicine in treating cervical spondylotic radiculopathy with syndrome of Wind-cold Obstructing Collaterals	Zhou, L.	2015	Single Center	30 (12)	30 (11)	18-56 (mean 36±10)	20-58 (mean 37±10)	19-55 (mean 36±10)	8m-11y (mean 2.32±1.25y)	6m-11y (mean 2.45±1.37y)	5m-10y (mean 2.39±1.64y)	Oral Chinese herbal decoction	Electroacupuncture	Electroacupuncture + Chinese herbal decoction		Guizhi Jia Gegen Decoction was used as the basic prescription. Take 1 dose daily, twice in the morning and twice in the evening.	Acupuncture is performed on the bilateral Fengchi, Tianzhu, C4-7 Jiaji points and Lieque, Houxi, and Waiguan acupoints in the affected side. After getting the Qi, the electroacupuncture instrument was connected and the needles were retained for 30 minutes. Treatment is performed once a day.	Group 1 operation + Group 2 operation	15d	None	Clinical efficacy (cases), Northwick Park neck pain scale score (points)
7	The Doctor of Traditional Chinese Medicine Massage Therapy Clinical Study on Cervical Spondylosis of Nerve Root Type	Du, L. F.	2016	Single Center	60 (33)	60 (35)	mean 45.02±6.28	mean 52.36±4.51		mean 4.52±1.08 years	mean: 3.86±0.95y		traditional Chinese medicine	Chinese medicine + massage			Jingfukang Granule was administered after breakfast and dinner, 1 package/time, 2 times/day, and continuous treatment for 2 weeks was a course of treatment	Massage was performed on the Fengchi, Jianjing, Quchi, Hegu and other acupoints respectively. Then neck stretching was performed, once a day, with continuous massage treatment for 2 weeks as a course of treatment.		NK	None	Clinical symptom improvement (points), treatment effects (cases)
8	The Clinical £Òesearch into Cervical Spondylotic £Òadiculopathy Treated with Suspension Movement Therapy in Combination with Massage therapy	Feng, Z. Y.	2016	Single Center	25 (12)	25 (13)	48. 38 ± 14. 93	48. 26 ± 15. 27		5.25±2.36a	5.33±2.47a		Massage	Suspension exercise therapy + massage			The kneading manipulation was performed at the Tianzong, Jianjing, Fengchi, Hegu, and Ashi acupoints. The plucking technique was performed for 8 to 10 min and repeated 5-10times at each acupoint. The frequency was about 30 times /min. Cervical spine rotation manipulation was used for 45 min, once a day, 10 days as a course of treatment, and a total of 3 courses of treatment were required.	Traction therapy was performed, with each treatment session lasting 45 min, once a day, 10 days as one course of treatment, and a total of 3 courses of treatment were required.		30d	None	Visual analogue scale (points), neck disability index (points)
9	Efficacy of Acupuncture Combined with Fire Dragon Moxibustion for Patients with Cervical Spondylotic Radiculopathy of Kidney-Deficiency-Cold Type	Jing, FQ	2016	Single Center	40 (12)	50 (16)	51.4±10.9	47.6±9.1		22.5±23.1m	23.7±23.1m		Acupuncture	Acupuncture + Fire Dragon Moxibustion			Acupoints: Dazhui, Ganshu, Tianzhu, Houxi, cervical vertebrae Jiaji, Taixi, Shenmai, Zusanli, and Shenshu acupoints.Acupuncture was performed once a day, with 30min for each treatment session. 5sessions were performed from Monday to Friday, 2 days off on weekends, with 5 treatment sessions as one course of treatment	Acupuncture in the control group + the following procedure: starting from the patients' Dazhui and Fengmen acupoints to Zhibian acupoints, a layer of Chinese medicinal powder with a thickness of about 1 mm was spread on the Governor Vessel and the Foot-Taiyang Bladder Meridian, and then fire dragon moxibustion was performed. The above treatment was performed once every 3 days. On the day of fire …		2 weeks	None	Clinical efficacy (cases)
10	Acupuncture^moxibustionand Massage in the Treatment of Cervical Spondylotic Radiculopathy 33 cases	Li, JM	2016	Single Center	33 (NK)	33 (NK)	28-70 (mean 50.4 ± 6.5)			5d-6y (mean 3.2±1.4y)			Traction	Acupuncture + Massage			Traction therapy,40min /session, once a day.	Acupuncture and massage treatment was used. Both groups of patients were treated for 10 days. The operation was as follows. Acupuncture treatment: Appropriate acupoints were selected, including Fengchi, Yanglao, Ashi, Dazhui, Hegu, Shousanli, Houxi,and the Jiaji acupoints on the affected side and near the vertebral body. After getting the qi, the needles were retained for 30 minutes, once a day; …		NK	None	Treatment effects (cases)
11	Clinical study of neck point Bailao(Ex-HN15) Injection as main therapy plus acupuncture for cervical spondylotic radiculopathy	Zhang, H.	2016	Single Center	100 (42)	100 (45)	28-60 (mean 49±11)	25-60 (mean 50±12)		1d-48d (mean 11.81±7.21)d	1d-36d (mean 12.68±6.68)d		Oral drugs	Acupuncture + acupoint injection			Oral nonsteroidal drug diclofenac sodium 50mg (after meals), 2 times a day; methylcobalamin tablets 0.5mg (after meals), 3 times a day. 10 days of treatment is a course of treatment, with a rest for 5 days between treatment courses, and a total of 2 courses of treatment were required.	The cervical vertebral Jiaji, Jing Bailao (bilaterally), Dazhui, Dazhui, Quchi, Shousanli, Waiguan, and Houxi acupoints were selected. The needles were retained for 20 minutes. The treatment was performed once a day, with 10 sessions as a course of treatment. The patients rested for 5 days between courses, and were treated for 2 courses in total. Then injection at acupoints was performed, once a …		25d	3 months	Clinical efficacy (cases), symptom and sign scores (points)
12	Observation on clinical effects of acupuncture plus external medicine application for cervical radiculopathy	Wu, JX	2018	Multi-center	48 (20)	50 (19)	mean 52.4±10.3	mean 54.6±8.7		mean 3.9±1.3m	mean 3.9±1.3m		Acupuncture	Acupuncture + drug application			Acupoints: Fengfu, Fengchi, Jingjiaji, Jianjing, Dazhui and Baihui. The needles were retained for 30 minutes. Once a day, 10 days of treatment is a course of treatment.	Operation in the control group + preparation of external application medicine: The acupoints were the same as those in acupuncture group. Adhesive tapes were used to stick the medicine cake on each acupoint for 12 hours a day for 10 consecutive days. Patients in the observation group first received acupuncture treatment, then rested for 5 days, and then used the medicine externally."		10d	None	Clinical efficacy (cases), symptom scores (points)
13	Clinical observation on warm needling moxibustion plus acupoint sticking therapy for cervical radiculopathy	Yang, XB	2019	Single Center	40 (18)	40 (21)	26-65 (mean 41.6±10.6)	24-66 (mean 42.1±10.0)	25-67 (mean 40.3±10.4)	mean 17.2±8.4m	mean 15.6±9.07m	mean 16.1±8.5m	Acupoint application	Warm acupuncture	Warm acupuncture + acupoint application		Plastic film or medical fabric was used to stick the pills on the acupoints. Acupoint application lasted for 2 hours each time and was applied once every 7 days, a total of 3 times were required.	The main acupoints were Dazhui on the affected side, Tianzhu on both sides, Bailao, Weizhong on both sides, and Houxi acupoints. After acupuncture, moxibustion was performed, with each acupoint treated three times, once every other day, for three consecutive weeks.	Group 1 + Group 2 Operation	weeks	None	Efficacy (cases), visual analogue scale (points)
14	Effects of warm acupuncture combined with stereo-dynamic interferential electrotherapy on clinical efficacy and hemodynamics of cervical spondylotic radiculopathy	Liu, Y.	2020	Single Center	42 (23)	42 (20)	49.28±8.30	49.75±8.64	48.96±8.07	5.72±2.83y	5.90±2.38y	5.36±2.95y	Warm acupuncture	Stereodynamic Interference Electrotherapy	Warm acupuncture + three-dimensional dynamic interference electrotherapy		Warm acupuncture group: acupoints: cervical vertebra Jiaji, Dazhui, Tianzong, Quyuan, Jianyu, Quchi, and Zusanli acupoints. Moxibustion was performed after getting qi. Warm acupuncture was performed once a day for consecutive 5 days as one course of treatment.Two courses of treatment were required.	The treatment was performed using an electrotherapy device for 30 minutes, once a day, with 5 consecutive days as a course of treatment. There was a 2-day interval between each course of treatment, with a total of 2 courses of treatment required.	The patients in the combined treatment group received stereodynamic interference electrotherapy immediately after warm acupuncture, with the same specific method as above. Once a day, 5 consecutive days as a course of treatment. Each course of treatment was 2 days apart, for a total of 2 courses of treatment.	12d	None	Clinical efficacy (cases), visual analogue scale (points), neck disability index (points)
15	Therapeutic efficacy observation of warm needling moxibustion plus spine subtle adjusting manipulation for cervical radiculopathy	Pan, GL	2021	Single Center	35 (14)	35 (12)	mean 46.6±8.7	mean 49.6±8.3		mean 6.2±4.6m	mean 5.7±4.7m		Warm acupuncture	Warm acupuncture + spinal fine-tuning treatment			Acupoints: bilateral C3-C6 Jiaji acupoints. Method: After acupuncture was performed to get qi, moxibustion was implemented, with three moxa cones for each acupoint. The needles were retained for 20 minutes.	Loosening technique: kneading and pressing manipulations were used. After about 5 minutes, the bilateral Fengchi points were pressed for about 1 minute. Then rolling manipulation was performed on the supraspinatus and levator scapulae for about 5 minutes. Then fine-tuning technique and scrubbing technique were performed. For each treatment session, warm acupuncture was performed first, followed b…		4 weeks	None	Clinical efficacy (cases), visual analogue scale (points)
16	Randomized controlled trial on cervical spondylotic radiculopathy of wind-cold-damp type treated with acupuncture and thunder-fire moxibustion	Shi, H.	2021	Single Center	47 (23)	47 (25)	26-64 (mean 45.2±9.4)	28-62 (mean 46.3±9.3)		1-18m (mean 8.4±5.0m)	1-18m (mean 9.3±4.6m)		Acupuncture	Acupuncture + Thunder Fire Moxibustion			Conventional acupuncture treatment was used. Fengchi, Tianzhu, Jingjiaji, Dazhui, Jianjing, Tianzong, Quchi, Waiguan, Hegu, and Houxi on the affected side were selected. 30min/time, 1 time/day, 5 times/week, for a total of 4 weeks.	After conventional acupuncture treatment, thunder-fire moxibustion was performed on Fengchi, Jingjiaji, Dazhui, Jianjing and Tianzong acupoints, 20min/time, once every other day, 3 times/week, for 4 weeks		4 weeks	None	Clinical efficacy (cases), McGill questionnaire score (points), neck-specific scale score (points)
17	Clinical observation of Jingfukang Granules combined with acupuncture in treatment of cervical spondylotic radiculopathy (wind-cold blocking collateral type)	Ji, XQ	2022	Single Center	50 (22)	50 (20)	32-69 (mean 51.4±4.2)	31-70 (mean 52.2±4.5)		6m-15y (mean 7.8±1.3y)	8m-14y (mean 7.4±1.1y)		Acupuncture	Acupuncture + Jingfukang Granules			Acupoints: Dazhui, Fengchi, Fengfu, cervical vertebrae Jiaji, and ear acupoints (cervical vertebrae area) were selected as acupuncture sites at the proximal end; Hegu, Houxi, Yanggu, Yangxi, Yangchi, and Daling points were selected as acupuncture sites at the distal end. The needles were retained for 30 minutes, once a day, for a total of 4 weeks.	Patients in the observation group took Jingfukang granules 10 g orally twice a day after meals while receiving acupuncture. The treatment lasted for 4 weeks.		4 weeks	None	Clinical symptom score (points)
18	Clinical observation of acupotomy combined with warm needling for cervical spondylotic radiculopathy of qi and blood stagnation syndrome	Li, AL	2022	Single Center	30 (14)	30 (16)	32-65 (mean 49.57±9.99)	28-68 (mean 49.00±12.59)	30-67 (mean 49.57±11.72)	2m-37m (mean 20.73±10.55m)	1-38m (mean 21.47±12.48m)	1-36m (mean 19.73±10.80m)	Needle knife	Warm acupuncture	Needle knife + warm acupuncture		Acupuncture knife treatment was performed once a day, once every 7 days, for 3 consecutive treatment sessions.	The Jiaji acupoints with positive neck tenderness and bilateral Tianzhu, Houxi and Xuanzhong acupoints were routinely selected. After getting the qi, moxibustion was performed, and the needles were retained for 30 minutes after ignition. Warm acupuncture treatment was performed once a day, and after 5 days of continuous treatment, the patients rested for 2 days. 7 days was a course of treatment, …	The patients were given acupuncture knife combined with warm acupuncture moxibustion treatment, and the method and course of treatment were the same as those of the acupuncture knife group and warm acupuncture moxibustion group.	weeks	None	PRI, CSR20, and clinical efficacy (examples)
					30 (18)
